# Supplementary material for: RAB10 involving in glucose uptake by regulating GLUT1 predicts poor prognosis in pancreatic cancer
Source: Research Square preprint supplement (doi:10.21203/rs.3.rs-1671317/v1), 2022-05-24
Supplement: Supplementary file 1 [file f00838f2842b91373503a2b5.xlsx]

## Sheet: Sheet1
Primer Name	Primer Sequence
Rab10-F	CTGCTCCTGATCGGGGATTC
Rab10-R	TGGGCTCTTTTACAGGGGTC
Glut1-F	AGATCGACACCTGGAGACGA
Glut1-R	GCGAAAATGGATACCGCCAC
Glut3-F	TCCTGGGTCGCTTGGTTATT
Glut3-R	ATTCCAACAACGATGCCCAG
GAPDH-F	GAAGGTGAAGGTCGGAGTC
GAPDH-R	GAAGATGGTGATGGGATTTC
